# Supplementary material for: Perceived Help-Seeking Difficulty, Barriers, Delay, and Burden in Carers of People with Suspected Dementia
Source: PubMed Central journal article supplement (PMC7999253; doi:10.3390/ijerph18062956), 2021-03-13
Supplement: ijerph-18-02956-s001.pdf [file ijerph-18-02956-s001.pdf]

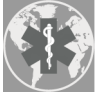

**Supplementary Table. S1** Correlation matrix of key variables.

|                                      | 1      | 2       | 3     | 4     | 5      | 6      | 7       | 8      | 9      | 10     | 11 |
|--------------------------------------|--------|---------|-------|-------|--------|--------|---------|--------|--------|--------|----|
| <b>1. Age (person with dementia)</b> |        |         |       |       |        |        |         |        |        |        |    |
| <b>2. Age (carer)</b>                | 0.27** |         |       |       |        |        |         |        |        |        |    |
| <b>3. Education (carer)</b>          | -0.10  | -0.54** |       |       |        |        |         |        |        |        |    |
| <b>4. Monthly income (carer)</b>     | 0.05   | -0.34** | 0.23  |       |        |        |         |        |        |        |    |
| <b>5. Time to help-seeking</b>       | 0.06   | 0.09    | 0.03  | -0.00 |        |        |         |        |        |        |    |
| <b>6. Perceived difficulty</b>       | -0.00  | -0.06   | -0.02 | -0.00 | 0.06   |        |         |        |        |        |    |
| <b>7. ADCS-ADL</b>                   | -0.22* | -0.02   | 0.17  | -0.17 | -0.09  | -0.25* |         |        |        |        |    |
| <b>8. NPI-Q severity</b>             | -0.03  | -0.09   | -0.02 | 0.19  | 0.36** | 0.20*  | -0.25** |        |        |        |    |
| <b>9. Role strain</b>                | 0.00   | -0.27** | 0.12  | 0.09  | 0.16   | 0.18   | -0.35** | 0.59** |        |        |    |
| <b>10. Self-criticism</b>            | -0.03  | -0.26** | 0.10  | 0.06  | 0.08   | 0.41** | -0.16   | 0.20*  | 0.35** |        |    |
| <b>11. Negative emotions</b>         | 0.02   | -0.23*  | 0.07  | 0.06  | 0.16   | 0.23*  | -0.38** | 0.56** | 0.76** | 0.33** |    |

\*p<0.05; \*\*p<0.01

ADCS-ADL = Alzheimer’s Disease Cooperative Study-Activities of Daily Living; NPI-Q = Neuropsychiatric Inventory-Questionnaire
